# Supplementary material for: SNP interactions of Helicobacter pylori-related host genes PGC, PTPN11, IL1B, and TLR4 in susceptibility to gastric carcinogenesis
Source: PubMed Central journal article supplement (PMC4662472; doi:10.18632/oncotarget.4231), 2015-05-22
Supplement: oncotarget-06-19017-s001.pdf [file oncotarget-06-19017-s001.pdf]

## SNP interactions of *Helicobacter pylori*-related host genes *PGC*, *PTPN11*, *IL1B*, and *TLR4* in susceptibility to gastric carcinogenesis

### Supplementary Material

**Supplementary Table 1: Predicted function of the selected tagSNPs in the four genes of interest**

| Gene symbol   | tagSNP_ID, allele | Position   | Predicted functional effects <sup>a</sup> | Tagging SNP                                                  |
|---------------|-------------------|------------|-------------------------------------------|--------------------------------------------------------------|
| <i>TLR4</i>   | rs10983755,G/A    | upstream   | at TF binding site                        | rs10983755,rs10759932                                        |
|               | rs11536878,A/C    | intron     | intronic enhancer                         | rs11536878,rs11536879                                        |
| <i>PTPN11</i> | rs12229892,A/G    | intron     | at TF binding site                        | rs12229892                                                   |
|               | rs1143643,A/G     | intron     | splicing regulation                       | rs1143643,rs3917368,rs1143633                                |
| <i>IL1B</i>   | rs1143627,C/T     | upstream   | at TF binding site                        | rs1143627,rs16944,rs10169916,rs4848306,rs13013349,rs13032029 |
|               | rs1143623,C/G     | UTR        | at TF binding site                        | rs1143623,rs12621220                                         |
| <i>PGC</i>    | rs4711690,C/G     | intron     | splicing regulation                       | rs4711690,rs4714509,rs3804279,rs12664901                     |
|               | rs9471643,G/C     | upstream   | at TF binding site                        | rs9471643                                                    |
|               | rs6458238,A/G     | upstream   | at TF binding site                        | rs6458238,rs11967238                                         |
|               | rs6912200,C/T     | upstream   | no known function                         | rs6912200,rs6907935                                          |
|               | rs6939861,A/G     | downstream | no known function                         | rs6939861                                                    |
|               | rs3789210,C/G     | intron     | no known function                         | rs3789210                                                    |
|               | rs6941539,C/T     | upstream   | no known function                         | rs6941539,rs6914124                                          |

<sup>a</sup>, The functional effects for the selected tagSNPs were predicted using the FastSNP Search tool (<http://FastSNP.ibms.sinica.edu.tw/>).

**Supplementary Table 2: Two-way interaction effect between PGC tagSNP and TLR4 and IL1B tagSNP on gastric cancer risk**

| PGC tagSNP |                | IL1B rs1143643                                   |                 | IL1B rs1143627                                   |                 | TLR4 rs10983755                                  |                 | TLR4 rs11536878                                  |                 |
|------------|----------------|--------------------------------------------------|-----------------|--------------------------------------------------|-----------------|--------------------------------------------------|-----------------|--------------------------------------------------|-----------------|
|            |                | AA                                               | AG/GG           | TT                                               | TC/CC           | GG                                               | GA/AA           | CC                                               | CA/AA           |
| rs4711690  |                |                                                  |                 |                                                  |                 |                                                  |                 |                                                  |                 |
| CC         | Controls/Cases | 202/110                                          | 501/311         | 192/112                                          | 510/304         | 286/217                                          | 294/188         | 566/324                                          | 138/92          |
|            | OR(95% CI)     | 1(ref)                                           | 1.20(0.89,1.62) | 1(ref)                                           | 1.11(0.82,1.58) | 1(ref)                                           | 0.76(0.57,1.00) | 1(ref)                                           | 1.14(0.82,1.58) |
| CG/GG      | Controls/Cases | 150/84                                           | 408/205         | 149/82                                           | 82,1.50)        | 244/136                                          | 226/144         | 442/231                                          | 116/47          |
|            | OR(95% CI)     | 1.02(0.69,1.51)                                  | 0.90(0.66,1.24) | 1.03(0.69,1.52)                                  | 0.84(0.61,1.16) | 0.71(0.53,0.96)                                  | 0.68(0.50,0.92) | 0.87(0.69,1.10)                                  | 0.63(0.42,0.95) |
|            |                | P for interaction=0.793, interaction index =0.74 |                 | P for interaction=0.207, interaction index =0.74 |                 | P for interaction=0.272, interaction index =1.27 |                 | P for interaction=0.099, interaction index =0.64 |                 |
| rs6458238  |                |                                                  |                 |                                                  |                 |                                                  |                 |                                                  |                 |
| GG         | Controls/Cases | 281/164                                          | 755/422         | 274/161                                          | 758/418         | 435/300                                          | 431/266         | 836/456                                          | 201/116         |
|            | OR(95% CI)     | 1(ref)                                           | 0.98(0.76,1.26) | 1(ref)                                           | 0.91(0.70,1.17) | 1(ref)                                           | 0.79(0.63,1.00) | 1(ref)                                           | 1.03(0.77,1.37) |
| AG/AA      | Controls/Cases | 71/30                                            | 157/95          | 67/35                                            | 159/91          | 97/56                                            | 90/65           | 175/103                                          | 52/23           |
|            | OR(95% CI)     | 0.68(0.41,1.14)                                  | 1.01(0.71,1.43) | 0.73(0.44,1.21)                                  | 0.94(0.66,1.34) | 0.85(0.58,1.27)                                  | 0.89(0.61,1.30) | 1.03(0.76,1.38)                                  | 0.73(0.42,1.28) |
|            |                | P for interaction=0.181, interaction index =1.50 |                 | P for interaction=0.246, interaction index =1.42 |                 | P for interaction=0.328, interaction index =1.32 |                 | P for interaction=0.284, interaction index =0.70 |                 |
| rs9471643  |                |                                                  |                 |                                                  |                 |                                                  |                 |                                                  |                 |
| GG/CC      | Controls/Cases | 215/124                                          | 554/335         | 208/129                                          | 561/323         | 331/219                                          | 316/223         | 620/357                                          | 150/91          |
|            | OR(95% CI)     | 1(ref)                                           | 1.15(0.86,1.53) | 1(ref)                                           | 1.02(0.76,1.35) | 1(ref)                                           | 0.92(0.70,1.20) | 1(ref)                                           | 0.98(0.71,1.35) |

|           |                |                                                     |                 |                                                       |                 |                                                     |                 |                                                     |                 |
|-----------|----------------|-----------------------------------------------------|-----------------|-------------------------------------------------------|-----------------|-----------------------------------------------------|-----------------|-----------------------------------------------------|-----------------|
| GC        | Controls/Cases | 138/70                                              | 352/181         | 132/66                                                | 357/185         | 200/136                                             | 204/108         | 389/200                                             | 102/48          |
|           | OR(95% CI)     | 0.91(0.61,1.36)                                     | 0.85(0.82,1.16) | 0.87(0.58,1.30)                                       | 0.78(0.57,1.07) | 0.91(0.67,1.24)                                     | 0.63(0.46,0.86) | 0.80(0.63,1.01)                                     | 0.75(0.50,1.12) |
|           |                | P for interaction=0.389,<br>interaction index =0.81 |                 | P for interaction=0.613, interaction<br>index =0.88   |                 | P for interaction=0.194, interaction<br>index =0.75 |                 | P for interaction=0.882,<br>interaction index =0.96 |                 |
| rs3789210 |                |                                                     |                 |                                                       |                 |                                                     |                 |                                                     |                 |
| CC        | Controls/Cases | 178/126                                             | 491/360         | 178/133                                               | 489/349         | 346/252                                             | 325/235         | 543/388                                             | 125/93          |
|           | OR(95% CI)     | 1(ref)                                              | 0.98(0.74,1.31) | 1(ref)                                                | 0.93(0.70,1.24) | 1(ref)                                              | 0.86(0)         | 1(ref)                                              | 0.97(0.70,1.33) |
| GC/GG     | Controls/Cases | 68/50                                               | 152/105         | 65/40                                                 | 154/113         | 105/78                                              | 66,1.10)        | 176/118                                             | 44/31           |
|           | OR(95% CI)     | 0.86(0.54,1.37)                                     | 0.98(0.69,1.41) | 0.73(0.45,1.19)                                       | 0.98(0.69,1.40) | 0.94(0.65,1.35)                                     | 0.83(0.58,1.19) | 0.94(0.70,1.25)                                     | 0.90(0.53,1.51) |
|           |                | P for interaction=0.602,<br>interaction index =1.16 |                 | P for interaction=0.213, interaction<br>index =1.44   |                 | P for interaction=0.891, interaction<br>index =1.04 |                 | P for interaction=0.981,<br>interaction index =0.99 |                 |
| rs6912200 |                |                                                     |                 |                                                       |                 |                                                     |                 |                                                     |                 |
| CC        | Controls/Cases | 59/36                                               | 166/129         | 55/43                                                 | 168/119         | 116/81                                              | 110/85          | 184/134                                             | 42/28           |
|           | OR(95% CI)     | 1(ref)                                              | 1.49(0.90,2.47) | 1(ref)                                                | 0.83(0.50,1.36) | 1(ref)                                              | 0.92(0.60,1.41) | 1(ref)                                              | 0.86(0.49,1.51) |
| CT/TT     | Controls/Cases | 185/138                                             | 476/335         | 187/129                                               | 473/341         | 332/249                                             | 330/223         | 532/372                                             | 128/96          |
|           | OR(95% CI)     | 1.33(0.80,2.19)                                     | 1.22(0.76,1.94) | 0.76(0.46,1.24)                                       | 0.82(0.52,1.30) | 0.97(0.68,1.37)                                     | 0.80(0.56,1.14) | 0.92(0.70,1.22)                                     | 0.91(0.63,1.32) |
|           |                | P for interaction=0.100,<br>interaction index =0.62 |                 | P for interaction=0.352, interaction<br>index OR=1.32 |                 | P for interaction=0.685, interaction<br>index =0.90 |                 | P for interaction=0.679,<br>interaction index =1.15 |                 |
| rs6939861 |                |                                                     |                 |                                                       |                 |                                                     |                 |                                                     |                 |
| GG        | Controls/Cases | 106/65                                              | 283/181         | 99/68                                                 | 286/175         | 208/125                                             | 181/120         | 318/194                                             | 69/46           |
|           | OR(95% CI)     | 1(ref)                                              | 1.04(0.71,1.53) | 1(ref)                                                | 0.86(0.58,1.27) | 1(ref)                                              | 0.97(0.69,1.36) | 1(ref)                                              | 0.92(0.59,1.43) |
| AG/AA     | Controls/Cases | 129/102                                             | 327/272         | 135/99                                                | 321/272         | 221/198                                             | 238/177         | 364/298                                             | 94/73           |
|           | OR(95% CI)     | 1.32(0.86,2.03)                                     | 1.39(0.96,2.02) | 1.04(0.67,1.60)                                       | 1.24(0.85,1.80) | 1.50(1.09,2.05)                                     | 1.13(0.82,1.55) | 1.33(1.04,1.71)                                     | 1.29(0.88,1.88) |

|           |                | P for interaction=0.970,<br>interaction index =1.01 |                 | P for interaction=0.205, interaction<br>index =1.39 |                 | P for interaction=0.279, interaction<br>index =0.78 |                 | P for interaction=0.857,<br>interaction index =1.05 |                 |
|-----------|----------------|-----------------------------------------------------|-----------------|-----------------------------------------------------|-----------------|-----------------------------------------------------|-----------------|-----------------------------------------------------|-----------------|
| rs6941539 |                |                                                     |                 |                                                     |                 |                                                     |                 |                                                     |                 |
| CC        | Controls/Cases | 179/131                                             | 459/329         | 178/124                                             | 456/334         | 333/240                                             | 306/219         | 513/362                                             | 122/91          |
|           | OR(95%CI)      | 1(ref)                                              | 1.00(0.75,1.33) | 1(ref)                                              | 1.10(0.83,1.48) | 1(ref)                                              | 0.90(0.70,1.17) | 1(ref)                                              | 0.96(0.70,1.34) |
| CT/TT     | Controls/Cases | 65/47                                               | 180/133         | 62/51                                               | 184/125         | 116/92                                              | 130/89          | 201/142                                             | 46/31           |
|           | OR(95%CI)      | 1.02(0.64,1.63)                                     | 1.07(0.76,1.51) | 1.34(0.83,2.15)                                     | 1.02(0.72,1.45) | 1.17(0.83,1.65)                                     | 0.87(0.62,1.23) | 1.03(0.78,1.35)                                     | 0.96(0.57,1.60) |
|           |                | P for interaction=0.853,<br>interaction index=1.05  |                 | P for interaction=0.194, interaction<br>index =0.69 |                 | P for interaction=0.453, interaction<br>index =0.83 |                 | P for interaction=0.918,<br>interaction index =0.97 |                 |

---

All tests were adjusted by age, sex and *H. pylori* infection.

**Supplementary Table 3: Two-way interaction effect between PGC tagSNP and TLR4 and IL1B tagSNP on atrophic gastritis risk**

| PGC tagSNP |              | IL1B rs1143643                                  |                 | IL1B rs1143627                                  |                 | TLR4 rs10983755                                 |                 | TLR4 rs11536878                                 |                 |
|------------|--------------|-------------------------------------------------|-----------------|-------------------------------------------------|-----------------|-------------------------------------------------|-----------------|-------------------------------------------------|-----------------|
|            |              | AA                                              | AG/GG           | TT                                              | TC/CC           | GG                                              | GA/AA           | CC                                              | CA/AA           |
| rs4711690  |              |                                                 |                 |                                                 |                 |                                                 |                 |                                                 |                 |
| CC         | Control/Case | 202/145                                         | 501/393         | 192/146                                         | 510/389         | 286/260                                         | 294/245         | 566/424                                         | 138/117         |
|            | OR(95%CI)    | 1(ref)                                          | 1.09(0.84,1.43) | 1(ref)                                          | 0.97(0.74,1.27) | 1(ref)                                          | 0.89(0.69,1.15) | 1(ref)                                          | 1.22(0.91,1.64) |
| CG/GG      | Control/Case | 150/92                                          | 408/269         | 149/91                                          | 405/269         | 244/169                                         | 226/166         | 442/396                                         | 116/62          |
|            | OR(95%CI)    | 0.78(0.54,1.12)                                 | 0.85(0.64,0.13) | 0.74(0.52,1.06)                                 | 0.78(0.59,1.03) | 0.70(0.53,0.92)                                 | 0.69(0.52,0.92) | 0.85(0.69,1.04)                                 | 0.65(0.45,0.93) |
|            |              | P for interaction=0.998, interaction index=1.00 |                 | P for interaction=0.699, interaction index=1.09 |                 | P for interaction=0.551, interaction index=1.13 |                 | P for interaction=0.054, interaction index=0.63 |                 |
| rs6458238  |              |                                                 |                 |                                                 |                 |                                                 |                 |                                                 |                 |
| GG         | Control/Case | 281/202                                         | 755/570         | 274/204                                         | 758/563         | 435/362                                         | 431/361         | 836/622                                         | 201/148         |
|            | OR(95%CI)    | 1(ref)                                          | 1.05(0.84,1.31) | 1(ref)                                          | 0.94(0.75,1.18) | 1(ref)                                          | 0.98(0.79,1.21) | 1(ref)                                          | 1.01(0.79,1.30) |
| AG/AA      | Control/Case | 71/35                                           | 157/96          | 67/34                                           | 159/98          | 97/67                                           | 90/53           | 175/101                                         | 52/31           |
|            | OR(95%CI)    | 0.64(0.40,1.02)                                 | 0.81(0.58,1.13) | 0.58(0.36,0.94)                                 | 0.76(0.54,1.05) | 0.87(0.61,1.25)                                 | 0.62(0.42,0.92) | 0.72(0.54,0.95)                                 | 0.81(0.50,1.31) |
|            |              | P for interaction=0.497, interaction index=1.21 |                 | P for interaction=0.254, interaction index=1.39 |                 | P for interaction=0.255, interaction index=0.73 |                 | P for interaction=0.719, interaction index=1.12 |                 |
| rs9471643  |              |                                                 |                 |                                                 |                 |                                                 |                 |                                                 |                 |
| GG/CC      | Control/Case | 215/143                                         | 554/426         | 208/150                                         | 561/414         | 330/260                                         | 316/267         | 620/448                                         | 150/121         |
|            | OR(95%CI)    | 1(ref)                                          | 1.14(0.88,1.48) | 1(ref)                                          | 1.02(0.79,1.33) | 1(ref)                                          | 1.03(0.81,1.32) | 1(ref)                                          | 1.18(0.88,1.57) |

|           |              |                                                 |                 |                                                 |                 |                                                 |                 |                                                 |                 |
|-----------|--------------|-------------------------------------------------|-----------------|-------------------------------------------------|-----------------|-------------------------------------------------|-----------------|-------------------------------------------------|-----------------|
| GC        | Control/Case | 138/93                                          | 352/237         | 132/87                                          | 357/243         | 200/168                                         | 204/145         | 389/272                                         | 102/57          |
|           | OR(95%CI)    | 0.93(0.65,1.33)                                 | 0.96(0.72,1.28) | 0.92(0.64,1.33)                                 | 0.87(0.66,1.16) | 1.00(0.75,1.32)                                 | 0.81(0.61,1.07) | 0.93(0.76,1.15)                                 | 0.73(0.50,1.06) |
|           |              | P for interaction=0.647, interaction index=0.91 |                 | P for interaction=0.718, interaction index=0.92 |                 | P for interaction=0.209, interaction index=0.77 |                 | P for interaction=0.096, interaction index=0.67 |                 |
| rs3789210 |              |                                                 |                 |                                                 |                 |                                                 |                 |                                                 |                 |
| CC        | Control/Case | 178/163                                         | 491/445         | 178/162                                         | 489/442         | 346/314                                         | 325/297         | 543/494                                         | 125/115         |
|           | OR(95%CI)    | 1(ref)                                          | 1.29(0.75,2.21) | 1(ref)                                          | 0.93(0.72,1.22) | 1(ref)                                          | 0.97(0.77,1.22) | 1(ref)                                          | 1.04(0.77,1.39) |
| GC/GG     | Control/Case | 68/48                                           | 152/114         | 65/51                                           | 154/111         | 105/80                                          | 115/81          | 176/131                                         | 44/31           |
|           | OR(95%CI)    | 0.95(0.73,1.23)                                 | 0.65(0.42,1.03) | 0.78(0.50,1.23)                                 | 0.74(0.52,1.04) | 0.81(0.57,1.14)                                 | 0.72(0.51,1.02) | 0.80(0.61,1.04)                                 | 0.75(0.45,1.24) |
|           |              | P for interaction=0.353, interaction index=1.29 |                 | P for interaction=0.987, interaction index=1.00 |                 | P for interaction=0.760, interaction index=0.93 |                 | P for interaction=0.749, interaction index=0.90 |                 |
| rs6912200 |              |                                                 |                 |                                                 |                 |                                                 |                 |                                                 |                 |
| CC        | Control/Case | 59/62                                           | 166/136         | 55/58                                           | 168/140         | 116/95                                          | 110/103         | 184/160                                         | 42/37           |
|           | OR(95%CI)    | 1(ref)                                          | 0.78(0.50,1.22) | 1(ref)                                          | 0.77(0.48,1.21) | 1(ref)                                          | 1.10(0.73,1.65) | 1(ref)                                          | 1.13(0.67,1.89) |
| CT/TT     | Control/Case | 185/148                                         | 476/420         | 187/153                                         | 473/411         | 332/298                                         | 330/272         | 532/460                                         | 128/109         |
|           | OR(95%CI)    | 0.82(0.52,1.27)                                 | 0.90(0.60,1.34) | 0.83(0.53,1.31)                                 | 0.85(0.56,1.29) | 1.17(0.84,1.63)                                 | 1.04(0.74,1.45) | 1.09(0.84,1.41)                                 | 1.05(0.74,1.50) |
|           |              | P for interaction=0.200, interaction index=1.41 |                 | P for interaction=0.289, interaction index=1.33 |                 | P for interaction=0.373, interaction index=0.81 |                 | P for interaction=0.621, interaction index=0.86 |                 |
| rs6939861 |              |                                                 |                 |                                                 |                 |                                                 |                 |                                                 |                 |
| GG        | Control/Case | 106/74                                          | 283/221         | 99/81                                           | 286/212         | 208/161                                         | 181/136         | 318/236                                         | 69/60           |
|           | OR(95%CI)    | 1(ref)                                          | 1.15(0.79,1.65) | 1(ref)                                          | 0.88(0.61,1.26) | 1(ref)                                          | 0.89(0.65,1.23) | 1(ref)                                          | 1.18(0.78,1.77) |
| AG/AA     | Control/Case | 129/128                                         | 327/323         | 135/126                                         | 321/323         | 221/217                                         | 238/234         | 364/371                                         | 94/79           |
|           | OR(95%CI)    | 1.50(1.00,2.25)                                 | 1.45(1.02,2.07) | 1.16(0.77,1.74)                                 | 1.20(0.84,1.70) | 1.25(0.93,1.68)                                 | 1.23(0.92,1.65) | 1.39(1.10,1.76)                                 | 1.19(0.83,1.72) |

|           |              | P for interaction=0.496, interaction index=0.85 |                 | P for interaction=0.503, interaction index=1.18 |                 | P for interaction=0.643, interaction index=1.11 |                 | P for interaction=0.253, interaction index=0.73 |                 |
|-----------|--------------|-------------------------------------------------|-----------------|-------------------------------------------------|-----------------|-------------------------------------------------|-----------------|-------------------------------------------------|-----------------|
| rs6941539 |              |                                                 |                 |                                                 |                 |                                                 |                 |                                                 |                 |
| CC        | Control/Case | 179/142                                         | 459/385         | 178/148                                         | 456/376         | 333/276                                         | 306/253         | 513/419                                         | 122/109         |
|           | OR(95%CI)    | 1(ref)                                          | 1.08(0.82,1.43) | 1(ref)                                          | 0.96(0.73,1.26) | 1(ref)                                          | 0.94(0.73,1.20) | 1(ref)                                          | 1.08(0.79,1.46) |
| CT/TT     | Control/Case | 65/66                                           | 180/172         | 62/63                                           | 184/174         | 116/114                                         | 130/124         | 201/200                                         | 46/37           |
|           | OR(95%CI)    | 1.37(0.89,2.11)                                 | 1.20(0.87,1.65) | 1.22(0.79,1.90)                                 | 1.08(0.78,1.49) | 1.12(0.81,1.55)                                 | 1.12(0.82,1.53) | 1.17(0.92,1.51)                                 | 1.09(0.68,1.76) |
|           |              | P for interaction=0.412, interaction index=0.81 |                 | P for interaction=0.779, interaction index=0.93 |                 | P for interaction=0.778, interaction index=1.07 |                 | P for interaction=0.647, interaction index=0.87 |                 |

All tests were adjusted by age, sex and *H. pylori* infection.

**Supplementary Table 4: Two-way interaction effect between TLR4 tagSNP and IL1B tagSNP on the risks of gastric cancer and atrophic gastritis**

| TLR4 tagSNP           | IL1B rs1143623                                                |                            | IL1B rs1143627                                                |                            | IL1B rs1143643                                                |                            |
|-----------------------|---------------------------------------------------------------|----------------------------|---------------------------------------------------------------|----------------------------|---------------------------------------------------------------|----------------------------|
|                       | GG                                                            | GC/CC                      | TT                                                            | TC/CC                      | AA                                                            | AG/GG                      |
| <b>For GC vs. CON</b> |                                                               |                            |                                                               |                            |                                                               |                            |
| TLR4                  |                                                               |                            |                                                               |                            |                                                               |                            |
| rs10983755            |                                                               |                            |                                                               |                            |                                                               |                            |
| GG                    | 184/136<br>1(ref)                                             | 347/218<br>0.84(0.62,1.15) | 142/105<br>1(ref)                                             | 386/247<br>0.83(0.60,1.15) | 140/106<br>1(ref)                                             | 392/249<br>0.87(0.63,1.21) |
| GA/AA                 | 197/116<br>0.66(0.46,0.93)                                    | 326/215<br>0.79(0.58,1.08) | 147/85<br>0.64(0.42,0.95)                                     | 373/244<br>0.77(0.55,1.07) | 157/82<br>0.62(0.41,0.91)                                     | 365/250<br>0.81(0.59,1.13) |
|                       | P for interaction=0.255, interaction<br>index=1.40(0.79,2.48) |                            | P for interaction=0.125, interaction<br>index=1.45(0.90,2.33) |                            | P for interaction=0.084, interaction<br>index=1.51(0.95,2.42) |                            |
| TLR4                  |                                                               |                            |                                                               |                            |                                                               |                            |
| rs11536878            |                                                               |                            |                                                               |                            |                                                               |                            |
| CC                    | 360/202<br>1(ref)                                             | 650/354<br>0.99(0.78,1.26) | 275/156<br>1(ref)                                             | 731/395<br>0.95(0.73,1.22) | 273/149<br>1(ref)                                             | 735/408<br>1.02(0.79,1.32) |
| CA/AA                 | 90/51<br>0.94(0.61,1.44)                                      | 164/88<br>0.96(0.68,1.36)  | 66/33<br>0.82(0.49,1.37)                                      | 186/106<br>0.98(0.70,1.38) | 79/37<br>0.76(0.46,1.23)                                      | 174/102<br>1.07(0.76,1.52) |
|                       | P for interaction=0.910, interaction<br>index=1.03(0.61,1.76) |                            | P for interaction=0.442, interaction<br>index=1.26(0.70,2.30) |                            | P for interaction=0.255, interaction<br>index=1.40(0.79,2.48) |                            |
| <b>For GA vs. CON</b> |                                                               |                            |                                                               |                            |                                                               |                            |
| TLR4                  |                                                               |                            |                                                               |                            |                                                               |                            |

|            |                                                            |                 |                                                            |                 |                                                               |                 |
|------------|------------------------------------------------------------|-----------------|------------------------------------------------------------|-----------------|---------------------------------------------------------------|-----------------|
| rs10983755 |                                                            |                 |                                                            |                 |                                                               |                 |
| GG         | 184/143                                                    | 347/285         | 142/115                                                    | 386/312         | 140/102                                                       | 392/327         |
|            | 1(ref)                                                     | 1.00(0.75,1.33) | 1(ref)                                                     | 0.95(0.70,1.29) | 1(ref)                                                        | 1.14(0.83,1.55) |
| GA/AA      | 197/153                                                    | 326/261         | 147/114                                                    | 373/295         | 157/122                                                       | 365/290         |
|            | 0.94(0.68,1.29)                                            | 0.94(0.70,1.25) | 0.91(0.63,1.32)                                            | 0.89(0.66,1.21) | 1.01(0.70,1.46)                                               | 1.04(0.76,1.43) |
|            | P for interaction=0.959, interaction index=0.99(0.66,1.48) |                 | P for interaction=0.936, interaction index=1.02(0.66,1.57) |                 | P for interaction=0.657, OR interaction index=0.91(0.59,1.40) |                 |
| TLR4       |                                                            |                 |                                                            |                 |                                                               |                 |
| rs11536878 |                                                            |                 |                                                            |                 |                                                               |                 |
| CC         | 360/260                                                    | 650/463         | 275/199                                                    | 731/518         | 273/191                                                       | 735/529         |
|            | 1(ref)                                                     | 0.96(0.77,1.19) | 1(ref)                                                     | 0.96(0.76,1.21) | 1(ref)                                                        | 1.07(0.85,1.34) |
| CA/AA      | 90/51                                                      | 164/128         | 66/37                                                      | 186/141         | 79/46                                                         | 174/133         |
|            | 0.79(0.52,1.18)                                            | 1.10(0.82,1.49) | 0.88(0.55,1.40)                                            | 1.04(0.76,1.41) | 0.94(0.61,1.45)                                               | 1.13(0.83,1.54) |
|            | P for interaction=0.126, interaction index=1.47(0.90,2.40) |                 | P for interaction=0.453, interaction index=1.23(0.72,2.10) |                 | P for interaction=0.648, interaction index=1.13(0.68,1.88)    |                 |

---

All tests were adjusted by age, sex and *H. pylori* infection. Abbreviation: GC, gastric cancer; GA, atrophic gastritis; CON, healthy controls.

**Supplementary Table 5: Four-way interaction effect between PGC rs4711690, PGC rs6912200, PTPN11 rs12229892 and IL1B rs1143623 on the risks of gastric cancer and atrophic gastritis**

| PGC<br>rs4711690 | PGC<br>rs6912200 | PTPN11<br>rs12229892 | IL1B<br>rs1143623 | GC vs CON        |       | GA vs CON       |       |
|------------------|------------------|----------------------|-------------------|------------------|-------|-----------------|-------|
|                  |                  |                      |                   | OR(95%CI)        | P     | OR(95%CI)       | P     |
| CC               | CC               | GG                   | GG                | 1(ref)           |       | 1(ref)          |       |
| CC               | CC               | GG                   | GC/CC             | 1.34(0.33,5.47)  | 0.681 | 0.43(0.12,1.50) | 0.186 |
| CC               | CC               | GA/AA                | GG                | 2.13(0.55,8.20)  | 0.271 | 0.37(0.11,1.28) | 0.118 |
| CC               | CC               | GA/AA                | GC/CC             | 1.07(0.30,3.81)  | 0.915 | 0.37(0.12,1.10) | 0.073 |
| CC               | CT/TT            | GG                   | GG                | 1.01(0.29,3.46)  | 0.994 | 0.45(0.15,1.31) | 0.142 |
| CC               | CT/TT            | GG                   | GC/CC             | 0.91(0.28,2.97)  | 0.873 | 0.49(0.18,1.35) | 0.166 |
| CC               | CT/TT            | GA/AA                | GG                | 0.77(0.23,2.50)  | 0.656 | 0.38(0.14,1.03) | 0.058 |
| CC               | CT/TT            | GA/AA                | GC/CC             | 1.37(0.43,4.38)  | 0.591 | 0.43(0.16,1.15) | 0.093 |
| CG/GG            | CC               | GG                   | GG                | 3.07(0.76,12.37) | 0.114 | 0.78(0.23,0.71) | 0.699 |
| CG/GG            | CC               | GG                   | GC/CC             | 1.30(0.35,4.93)  | 0.697 | 0.44(0.14,1.38) | 0.16  |
| CG/GG            | CC               | GA/AA                | GG                | 0.72(0.20,2.54)  | 0.610 | 0.23(0.08,0.68) | 0.008 |
| CG/GG            | CC               | GA/AA                | GC/CC             | 0.75(0.23,2.50)  | 0.644 | 0.30(0.11,0.84) | 0.022 |
| CG/GG            | CT/TT            | GG                   | GG                | 1.21(0.33,4.39)  | 0.772 | 0.32(0.10,1.01) | 0.052 |
| CG/GG            | CT/TT            | GG                   | GC/CC             | 0.73(0.21,2.48)  | 0.612 | 0.18(0.06,0.53) | 0.002 |
| CG/GG            | CT/TT            | GA/AA                | GG                | 0.85(0.26,2.85)  | 0.797 | 0.28(0.10,0.81) | 0.018 |
| CG/GG            | CT/TT            | GA/AA                | GC/CC             | 0.80(0.25,2.61)  | 0.712 | 0.36(0.13,0.97) | 0.044 |

P for interaction=0.084, interaction index=0.12

P for interaction=0.525, interaction index=2.10

All tests were adjusted by age, sex and *H. pylori* infection. Abbreviation: GC, gastric cancer; GA, atrophic gastritis; CON, healthy controls.
